# Supplementary material for: A Systematic Review of Pharmacological Treatments for Internet Gaming Disorder
Source: PubMed Central journal article supplement — Psychiatry Investig. 2023 Aug 11;20(8):696–706. doi: 10.30773/pi.2022.0297 (PMC10460977; doi:10.30773/pi.2022.0297), 2023-08-11
Supplement: pi-2022-0297-Supplementary-1.pdf [file pi-2022-0297-Supplementary-1.pdf]

## SUPPLEMENTARY MATERIALS

### MEDLINE and Embase search strategy

Internet Addiction Disorder (MeSH) OR  
"Video Game Addiction" OR  
"Gaming Disorder" OR  
(Behavior, Addictive (MeSH) AND (online gaming OR Video Games (MeSH)))

AND

Drug Therapy (MeSH) OR  
Medication OR  
Pharmacotherapy OR  
"pharmacological treatment" OR  
'antidepressant' OR  
Antidepressive Agents (MeSH) OR  
Antipsychotics OR  
Antipsychotic Agents (MeSH) OR  
Dopamine Uptake Inhibitors (MeSH) OR  
SNRI OR  
"Selective serotonin reuptake Inhibitors" OR  
SSRI OR  
Serotonin Uptake Inhibitors (MeSH) OR  
"Serotonin and Noradrenaline Reuptake Inhibitors" OR  
NDRI OR  
"norepinephrine-dopamine reuptake inhibitors" OR  
Methylphenidate (MeSH) OR  
Bupropion (MeSH) OR  
Antidepressive Agents, Tricyclic (MeSH) OR  
Tricyclic
